# Supplementary material
Source: PubMed Central journal article supplement (PMC5384715)
Supplement: NIHMS694299-supplement-01.pdf [file NIHMS694299-supplement-01.pdf]

## **Supporting information**

Figure S1-S5. Reactivity of B cell clones to HLA class I molecules.

Figure S6. Sequence analysis of B cell clones 2B4 and 2D9.

Table S1. Summary of patient characteristics.

Table S2. Summary of B cell clones reactivity.

**Table S1: Summary of patient characteristics**

| <b>Parameters</b>                              | <b>Values</b> |
|------------------------------------------------|---------------|
| <b>Age in year (mean±SD)</b>                   | 49.0±14.4     |
| <b>Gender, n (%)</b>                           |               |
| Male                                           | 192 (64.0%)   |
| Female                                         | 108 (36.0%)   |
| <b>Race, n (%)</b>                             |               |
| Caucasian                                      | 239 (79.7%)   |
| African                                        | 29 (9.6%)     |
| Asian                                          | 14 (4.7%)     |
| Hispanic                                       | 18 (6.0%)     |
| <b>No. of transplant, n (%)</b>                |               |
| First                                          | 259 (86.3%)   |
| Second                                         | 35 (11.7 %)   |
| Third                                          | 6 (2.0%)      |
| <b>Transfusion pre-Tx, (n %)</b>               |               |
| Yes                                            | 94 (31.3%)    |
| No                                             | 206 (68.7%)   |
| <b>Cause of end-stage renal disease, n (%)</b> |               |
| Polycystic kidney                              | 36 (12.0%)    |
| Focal Segmental Glomerulosclerosis (Primary)   | 26 (8.7%)     |
| IgA nephropathy                                | 39 (13.0%)    |
| Type I diabetes mellitus                       | 28 (9.3%)     |
| Hypertension                                   | 21 (7.0%)     |
| Obstructive/reflux uropathy/anatomical issues  | 22 (7.3%)     |
| Systemic lupus erythematosus                   | 6 (2.0%)      |
| Immune complex disease                         | 29 (9.7%)     |
| Congenital/hereditary disease                  | 18 (6.0%)     |
| Interstitial nephritis                         | 23 (7.7%)     |
| Focal Segmental Glomerulosclerosis (Secondary) | 12 (4.0%)     |
| Type II diabetes mellitus                      | 25 (8.3%)     |
| Others                                         | 4 (1.3%)      |
| Unknow                                         | 11 (3.7%)     |

**Table S2. Summary of reactivity of cell culture supernatants**

| <b>Clone</b> | <b>LPS</b> | <b>dsDNA</b> | <b>Insulin</b> | <b>HEK293<br/>lysate</b> | <b>Apoptotic<br/>JK cells</b> | <b>HLA<br/>CLASS I</b> |
|--------------|------------|--------------|----------------|--------------------------|-------------------------------|------------------------|
| 3D4          | -          | -            | -              | -                        | -                             | -                      |
| 2B4          | +          | +            | +              | +                        | +                             | +                      |
| 2D9          | +          | +            | +              | +                        | +                             | +                      |
| 4G4          | +          | +            | +              | +                        | +                             | +                      |
| 4G10         | +          | +            | +              | +                        | +                             | +                      |
